# Supplementary material for: Prokinetic and Laxative Effects of Chrozophora tinctoria Whole Plant Extract
Source: MDPI journal article supplement (doi:10.3390/molecules27072143), 2022-03-26
Supplement: s1 [file s1]

## Supplementary Materials

Supplementary Table S1. Chemical structure of the compounds identified in DCMC and EAC fractions.

| Structures of compounds of DCMC of <i>Chrozophora tinctoria</i> |                                        |                                                                                      |
|-----------------------------------------------------------------|----------------------------------------|--------------------------------------------------------------------------------------|
| S.No                                                            | Compound name                          | Structure                                                                            |
| 1                                                               | Hydroperoxide, 1-ethyl butyl           | 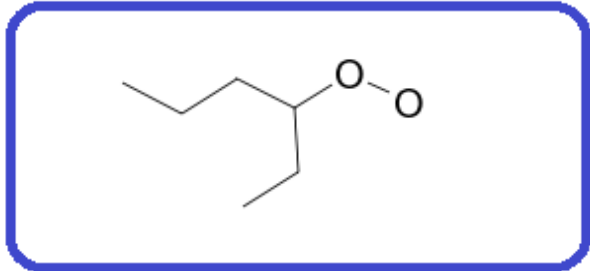   |
| 2                                                               | Silane, chlorodiisopropylmethyl-       |  |
| 3                                                               | 1-Hexadecene                           |  |
| 4                                                               | 3,7,11,15-Tetramethyl-2-hexadecen-1-ol |  |

|    |                                                                                   |                                                                                      |
|----|-----------------------------------------------------------------------------------|--------------------------------------------------------------------------------------|
| 5  | Hexadecanoic acid, methyl ester                                                   | 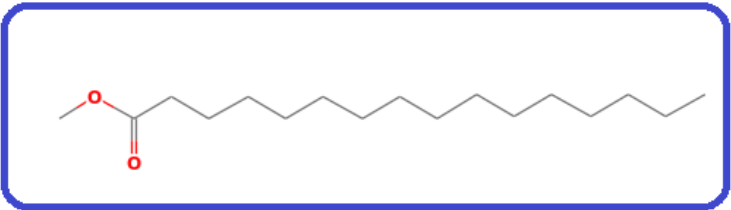   |
| 6  | 1-Eicosanol                                                                       |    |
| 7  | 10-Octadecanoic acid, methyl ester                                                |   |
| 8  | 9,12,15-Octadecatrienoic acid, 2,3-bis[(trimethylsilyl)oxy]propyl ester, (Z,Z,Z)- |  |
| 9  | 17-Pentatriacontene                                                               |  |
| 10 | 1,2-Benzenedicarboxylic acid, diisooctyl ester                                    |  |

**Structures of compounds of EAC of *Chrozophora tinctoria***

| S.No | Compound name                                | Structure                                                                            |
|------|----------------------------------------------|--------------------------------------------------------------------------------------|
| 1    | Imipramine                                   | 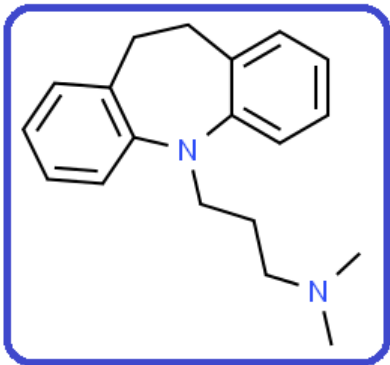  |
| 2    | Hexadecanoic acid, methyl ester              |  |
| 3    | 3,7,11,15-Tetramethyl-2-hexadecen-1-ol       |  |
| 4    | Pentadecanoic acid, 14-methyl-, methyl ester |  |

|   |                                                      |                                                                                                                                                                                                                                                                                                                                                                                                                     |
|---|------------------------------------------------------|---------------------------------------------------------------------------------------------------------------------------------------------------------------------------------------------------------------------------------------------------------------------------------------------------------------------------------------------------------------------------------------------------------------------|
| 5 | Hexadecanoic acid, ethyl ester                       | 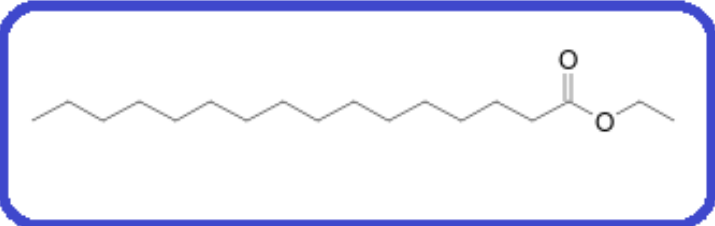 <p>The structure shows a long, straight hydrocarbon chain of 16 carbons. The first carbon is part of a carboxylate group, which is esterified with an ethyl group. The chain is drawn in a zig-zag pattern, and the ester group is shown with a double-bonded oxygen and a single-bonded oxygen connected to an ethyl group.</p> |
| 6 | Nonanoic acid, 9-(0-propylphenyl)-methyl ester       |  <p>The structure shows a nonanoic acid chain (9 carbons) esterified with a methyl group. The ester group is highlighted in red. The chain is drawn in a zig-zag pattern, and the ester group is shown with a double-bonded oxygen and a single-bonded oxygen connected to a methyl group.</p>                                    |
| 7 | 9,12,15-Octadecatrienoic acid, ethyl ester, (Z,Z,Z)- |  <p>The structure shows an 18-carbon chain with three double bonds at positions 9, 12, and 15, all in the (Z) configuration. The chain is drawn in a zig-zag pattern, and the ester group is shown with a double-bonded oxygen and a single-bonded oxygen connected to an ethyl group.</p>                                      |
